# Supplementary material
Source: PubMed Central journal article supplement (PMC10424638)
Supplement: NIHMS1916345-supplement-Supplementary_Data.pdf [file NIHMS1916345-supplement-Supplementary_Data.pdf]

Online supplement

Table S1: Comparison of the baseline data of patients who were on follow-up and those who were lost to follow-up.

| Variable                       | On follow-up<br>n=1133 | Lost to follow-up<br>n= 72 | P value |
|--------------------------------|------------------------|----------------------------|---------|
| Age, mean (SD) in years        | 61.5 (13.7)            | 57.7 (13.0)                | 0.021   |
| Women, n (%)                   | 353 (31.2)             | 18 (25.0)                  | 0.273   |
| Ejection fraction, n (%)       |                        |                            | 0.120   |
| HF <sub>r</sub> EF             | 700 (61.7)             | 52 (72.2)                  |         |
| HF <sub>m</sub> rEF            | 254 (22.4)             | 9 (12.5)                   |         |
| HF <sub>p</sub> EF             | 179 (15.8)             | 11 (15.2)                  |         |
| NYHA Class, n (%) <sup>*</sup> |                        |                            | 0.283   |
| NYHA Class III                 | 700 (64.1)             | 44 (63.8)                  |         |
| NYHA Class IV                  | 357 (32.7)             | 25 (36.2)                  |         |

\*NYHA Class data were missing in 43 participants. Additionally, 33 participants in the 'on follow-up' group were in the NYHA Class II.
